# Supplementary material for: South Korean Study to Prevent Cognitive Impairment and Protect Brain Health Through Lifestyle Intervention in At-Risk Elderly People: Protocol of a Multicenter, Randomized Controlled Feasibility Trial
Source: PubMed Central journal article supplement — J Clin Neurol. 2020 Apr 2;16(2):292–303. doi: 10.3988/jcn.2020.16.2.292 (PMC7174118; doi:10.3988/jcn.2020.16.2.292), 2020-04-02
Supplement: jcn-16-292-s002.pdf [file jcn-16-292-s002.pdf]

**Supplementary Table 2.** Details of the structured exercise programs tailored according to physical performance as well as physical condition

| Exercise name                  | Group session |   |   | Home session                |   |   |              |   |   |                                     |   |   |              |   |   |
|--------------------------------|---------------|---|---|-----------------------------|---|---|--------------|---|---|-------------------------------------|---|---|--------------|---|---|
|                                |               |   |   | Strength-intensive programs |   |   |              |   |   | Aerobic exercise-intensive programs |   |   |              |   |   |
|                                | Level         |   |   | Poor fitness                |   |   | Good fitness |   |   | Poor fitness                        |   |   | Good fitness |   |   |
|                                | 1             | 2 | 3 | 1                           | 2 | 3 | 1            | 2 | 3 | 1                                   | 2 | 3 | 1            | 2 | 3 |
| <b>Aerobic exercises</b>       |               |   |   |                             |   |   |              |   |   |                                     |   |   |              |   |   |
| Number walking*                | •             | • |   | •                           | • | • | •            | • | • | •                                   | • | • | •            | • | • |
| Number running <sup>†</sup>    | •             | • |   | •                           | • |   | •            | • | • | •                                   | • | • | •            | • | • |
| Time to stop                   | •             |   |   | •                           |   |   | •            |   |   | •                                   |   |   | •            |   |   |
| Step up & down                 | •             | • | • | •                           | • | • | •            | • | • | •                                   | • | • | •            | • | • |
| Quiz walking <sup>‡</sup>      |               | • |   |                             | • |   | •            |   |   |                                     |   |   | •            |   |   |
| Crab walking                   |               |   |   |                             |   | • |              |   | • |                                     | • |   |              | • |   |
| Spider walking                 |               | • |   |                             |   | • |              |   | • |                                     | • |   | •            |   |   |
| Jump rope                      |               |   | • |                             |   | • |              | • | • | •                                   | • | • | •            | • | • |
| Ladder walking                 |               |   | • |                             |   |   |              |   |   |                                     | • |   |              |   |   |
| Music walking                  |               |   | • |                             |   |   |              |   | • |                                     |   |   |              |   | • |
| <b>Resistance exercises</b>    |               |   |   |                             |   |   |              |   |   |                                     |   |   |              |   |   |
| Band routine                   | •             | • | • | •                           | • | • | •            | • | • | •                                   |   | • | •            |   | • |
| Chair routine                  | •             | • | • | •                           | • | • | •            | • | • |                                     | • |   |              | • |   |
| Animal walking                 |               |   |   |                             |   |   | •            |   |   |                                     |   |   | •            |   | • |
| Band pull touch <sup>§</sup>   |               |   |   |                             | • |   |              | • |   |                                     |   |   |              |   |   |
| Crab walking with band         |               | • |   |                             |   |   |              |   |   |                                     | • |   |              | • | • |
| <b>Balance exercise</b>        |               |   |   |                             |   |   |              |   |   |                                     |   |   |              |   |   |
| Single-leg standing            | •             |   | • |                             | • |   |              | • |   |                                     |   |   |              |   |   |
| Touch number                   | •             |   | • |                             |   |   |              |   |   |                                     |   | • |              |   |   |
| Move towel                     | •             |   | • | •                           |   |   | •            |   |   |                                     |   |   |              |   |   |
| Balloon toss                   |               | • |   |                             | • |   |              | • |   |                                     |   | • |              | • |   |
| Balloon kick                   |               | • |   |                             |   | • |              | • |   |                                     |   | • |              | • |   |
| <b>Finger-and-toe exercise</b> |               |   |   |                             |   |   |              |   |   |                                     |   |   |              |   |   |
| Grip                           | •             |   |   | •                           | • |   |              | • |   |                                     | • | • |              | • | • |
| Finger stamp                   |               | • |   | •                           | • | • |              | • | • | •                                   | • | • | •            | • | • |
| Okay 2 <sup>  </sup>           |               |   | • |                             |   | • |              |   | • |                                     |   | • |              |   | • |
| <b>Stretching exercise</b>     |               |   |   |                             |   |   |              |   |   |                                     |   |   |              |   |   |
| Brain stretching <sup>¶</sup>  | •             | • | • | •                           | • | • | •            | • | • | •                                   | • | • | •            | • | • |

\*Walking on the floor plates with numbers according to the directions, <sup>†</sup>Running on the floor plates with numbers according to the directions, <sup>‡</sup>Moving to the floor plate with the correct answer number of the calculation quiz from the middle of the floor plates, <sup>§</sup>One end of the band is fixed on the leg of the seated chair, the other end is fixed to the ankle, and the number plates are touched with the foot according to the directions, <sup>||</sup>Making an "okay" gesture with one hand and lifting two fingers up with the other hand, <sup>¶</sup>Stretching the body while listening to classical music.
